# Supplementary material
Source: publisher site journal article supplement (https://www.dovepress.com/article/236350)
Supplement: Supplementary file 1 [file get_supplementary_file.php]

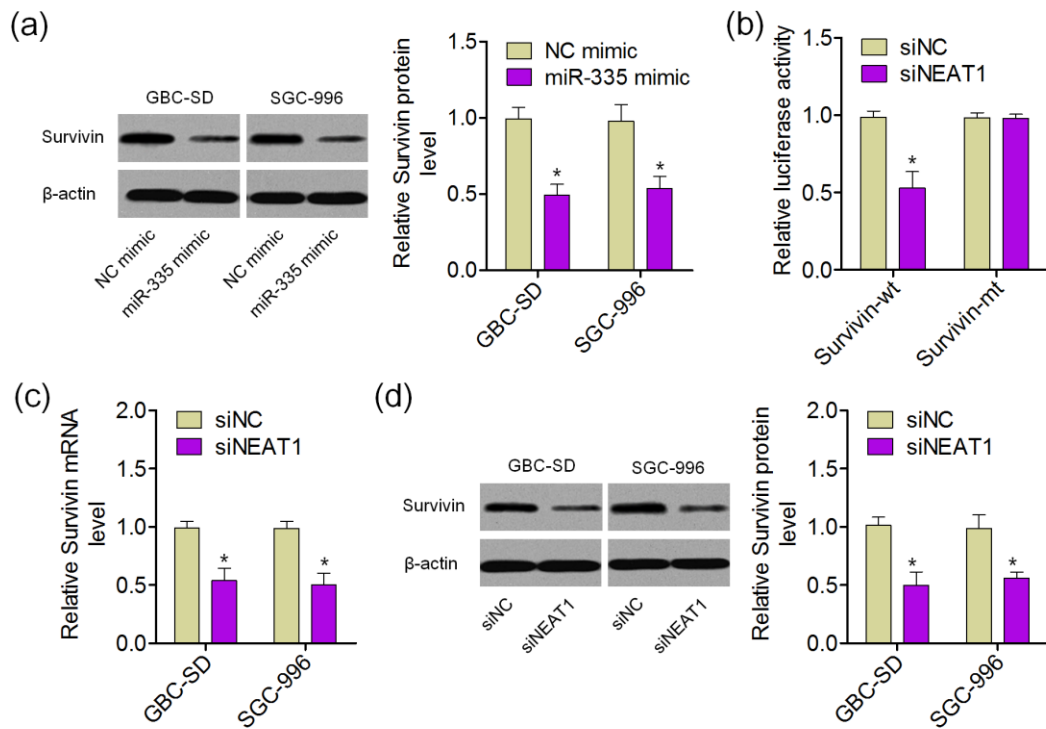

Figure S1. *NEAT1* promoted survivin expression by sponging *miR-335*. (a) Expression of survivin protein was measured by western blotting in GBC cells transfected with either the *miR-335* or NC mimic. (b) Knockdown of *NEAT1* decreased the luciferase activity of HEK293T cells transfected with survivin-wt. Expression of survivin mRNA (c) and protein (d) was measured in GBC cells transfected with si*NEAT1* or siNC. \*  $P < 0.05$ .

Table S1 The clinicopathologic characteristics of twenty-five GBC patients.

| Variable            | n  |
|---------------------|----|
| Gender              |    |
| Male                | 9  |
| Female              | 16 |
| Age (year)          |    |
| >60                 | 13 |
| ≤60                 | 12 |
| Tumor size (cm)     |    |
| >5                  | 10 |
| ≤5                  | 15 |
| Stage               |    |
| I+II                | 11 |
| III+IV              | 14 |
| Differentiation     |    |
| Well and moderately | 10 |
| Poorly              | 15 |
| Metastasis          |    |
| Yes                 | 12 |
| No                  | 13 |
